# Supplementary material
Source: PubMed Central journal article supplement (PMC3190747)
Supplement: supp_M111.274647_jbc.M111.274647-1.pdf [file supp_M111.274647_jbc.M111.274647-1.pdf]

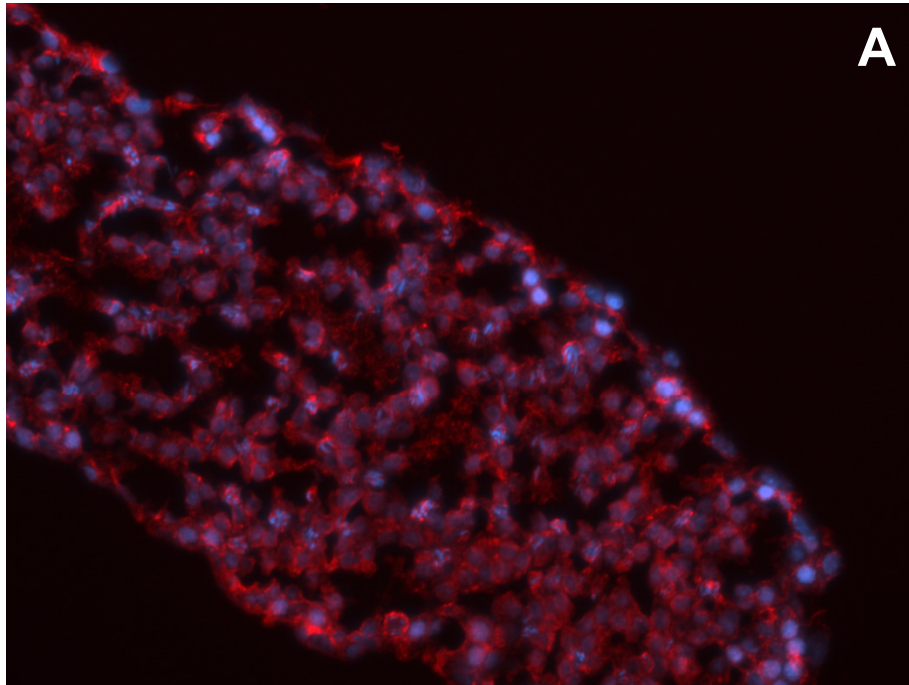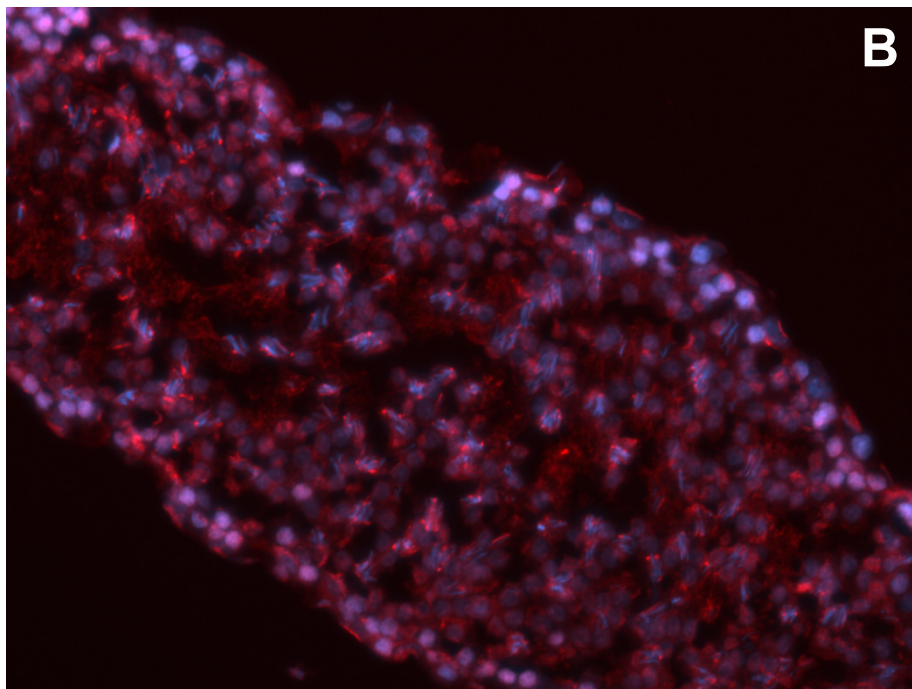

Similar expression patterns of p12 and MYPT3. p12 (panel A) and MYPT3 (panel B) were detected in sections of isolated seminiferous tubules by immunofluorescence microscopy. Co-localization within a single section was not possible, because p12 was detected by polyclonal anti-1017 antibody and MYPT3 with a polyclonal anti-Mypt3 antibody. DNA was stained using DAPI. Note that the protein patterns are very similar in the germ cells.

Supplemental Figure 1
